# Supplementary material for: Characterization of Maize miRNAs in Response to Synergistic Infection of Maize Chlorotic Mottle Virus and Sugarcane Mosaic Virus
Source: MDPI journal article supplement (doi:10.3390/ijms20133146), 2019-06-27
Supplement: s1 [file s1]

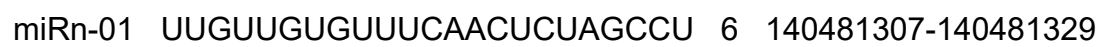

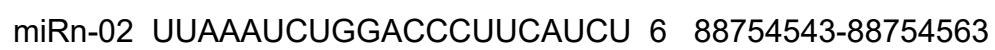

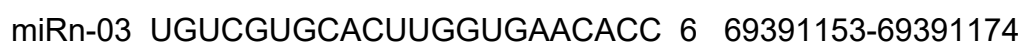

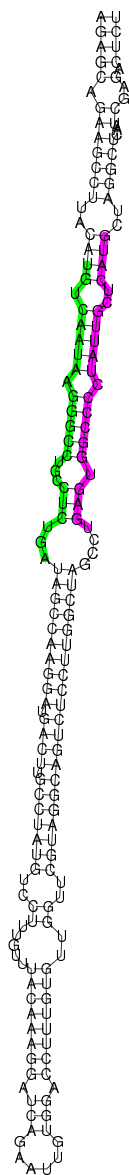

miRn-04 UGUCAAUAAGGGCCUGCCUCUGA 4 47540936-47540958

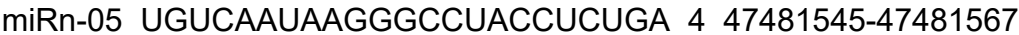

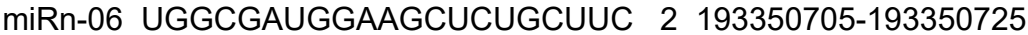

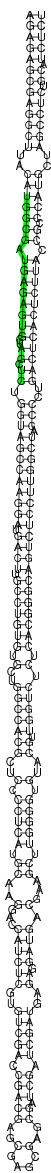

miRn-07 UGGCGAUGAGAGUGGUAGCUC 4 47269331-47269351

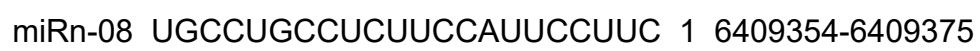



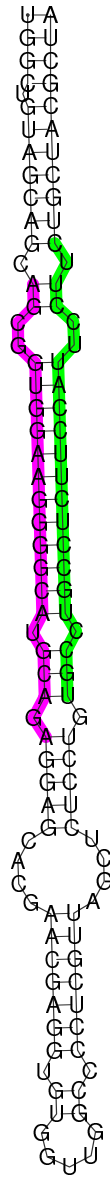

miRn-08 UGCCUGCCUCUCCA UCCUUC 9 153752335-153752356

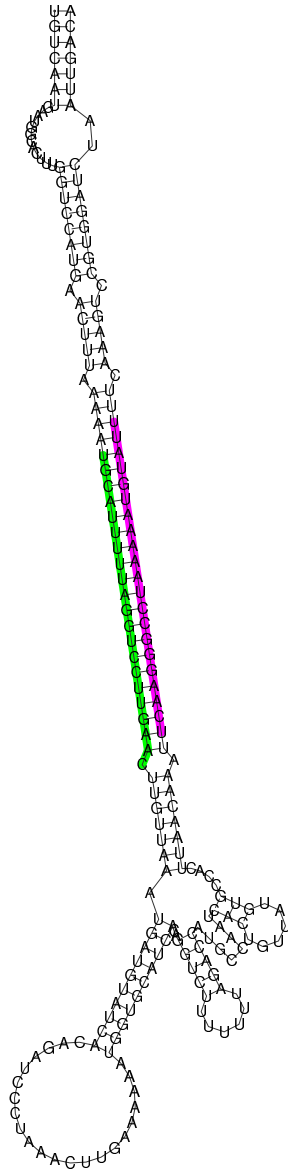

miRn-09 UGCAUUUUUAGGUCCUUGAAC 4 231951286-231951306

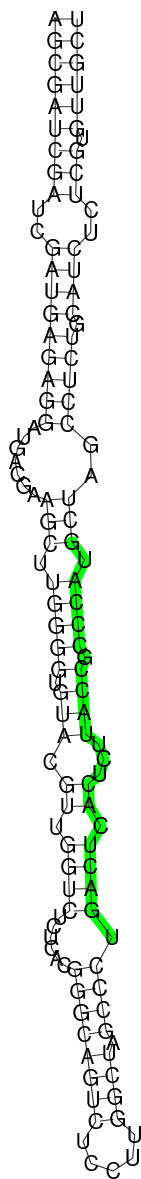

miRn-10 UGACUCACUCUUACCGCCCAUG 4 47269510-47269531

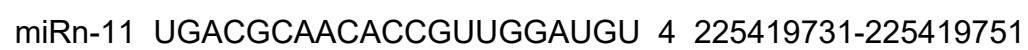

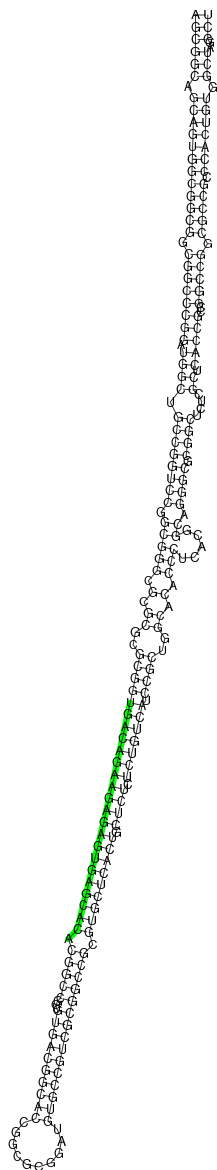

miRn-12 UGACAGAAGAGAGUGAGCACA 2 32121388-32121408

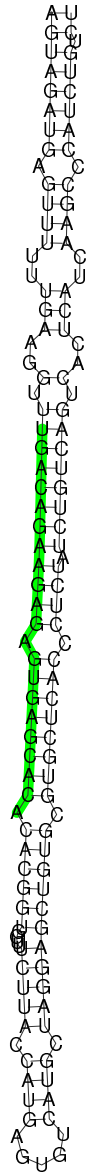

miRn-12 UGACAGAAGAGAGUGAGCACA 3 7775573-7775593

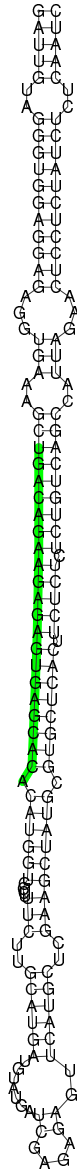

miRn-12 UGACAGAAGAGAGUGAGCACA 3 7775874-7775894

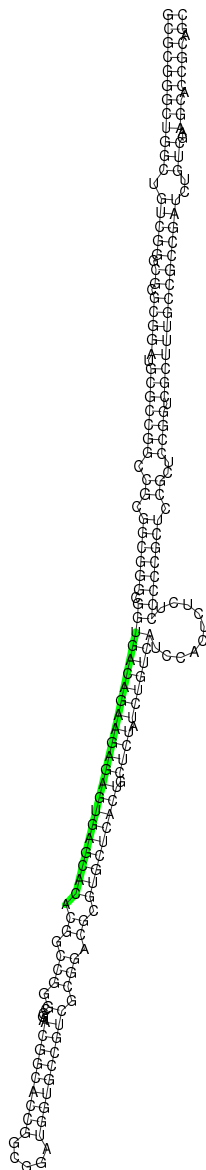

miRn-12 UGACAGAAGAGAGUGAGCACA 4 137206551-137206571



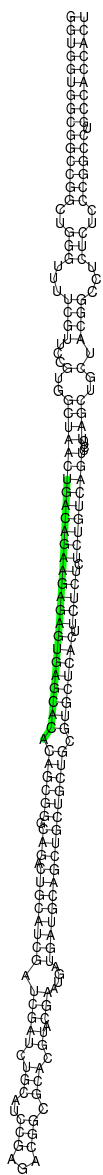

miRn-12 UGACAGAAGAGAGUGAGCACA 4 83914058-83914078

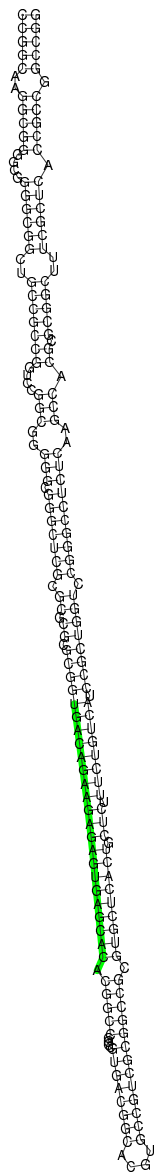

miRn-12 UGACAGAAGAGAGUGAGCACA 10 128550068-128550088

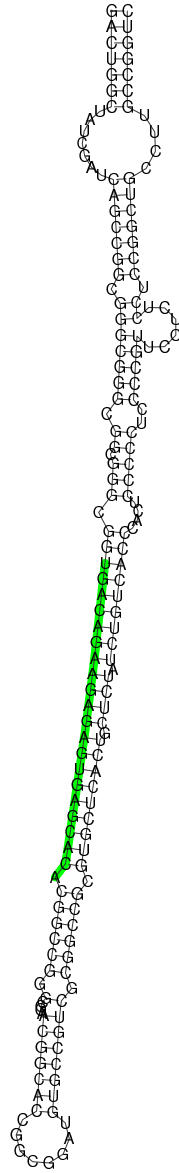

miRn-12 UGACAGAAGAGAGUGAGCACA 5 183907945-183907965

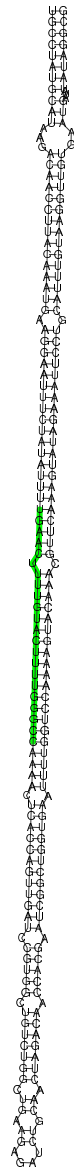

miRn-13 UGAACUUUUGUACUUUUGGGCC 10 113038375-113038396

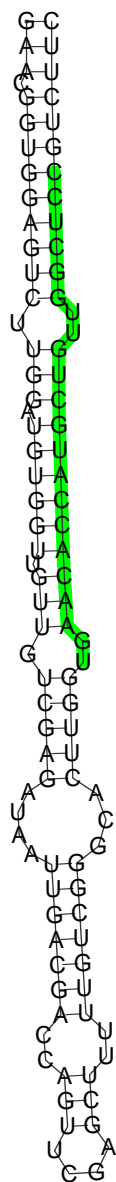

miRn-14 UGAACACCAUGCUGUUGGCUCC 7 147017886-147017907

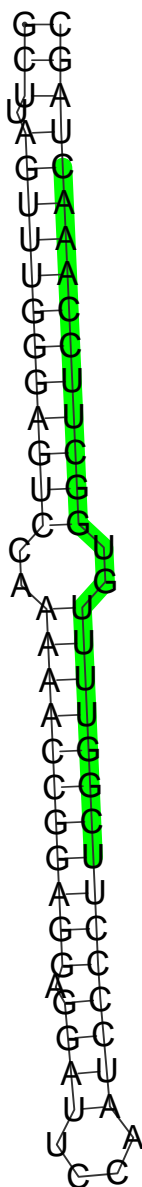

miRn-15 UCGUUUUGUGGCUUCCAAAC 1 280086660-280086680

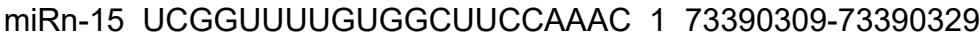

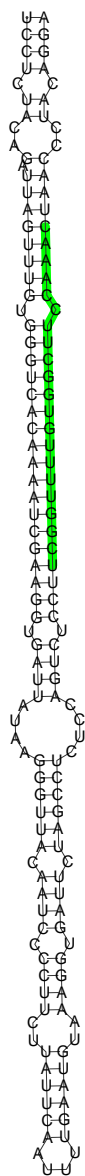

miRn-15 UCGUUUUGUGGCUUCCAAAC 7 166772904-166772924



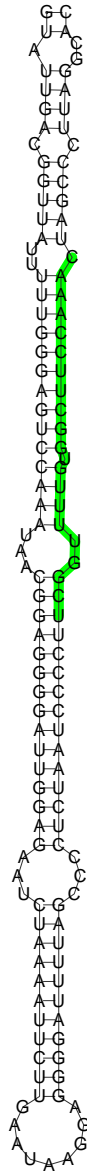

miRn-15 UCGGUUUUGUGGCUUCCAAAC 8 100779729-100779749

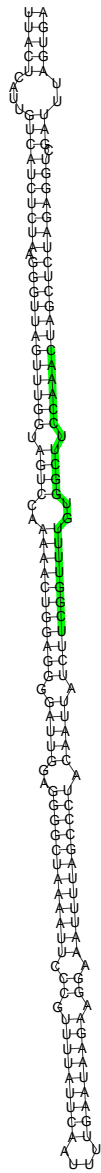

miRn-15 UCGGUUUUGUGGCUUCCAAAC 8 148688613-148688633

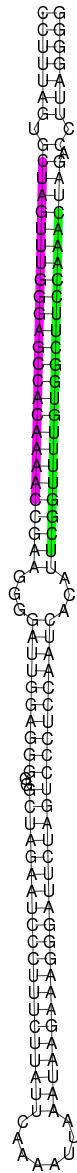

miRn-15 UCGUUUUGUGGCUUCCAAAC 5 214383005-214383025

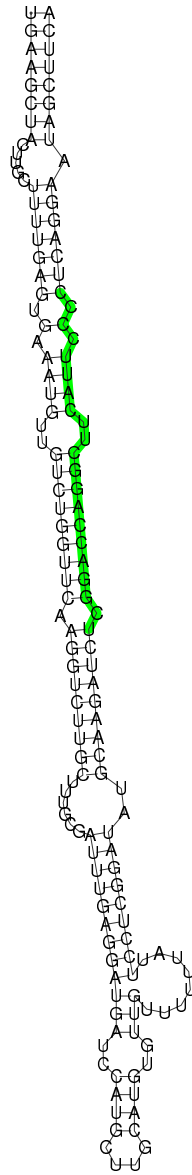

miRn-16 UCGGACCAGGCUUCAUUC CCC 1 223371679-223371699

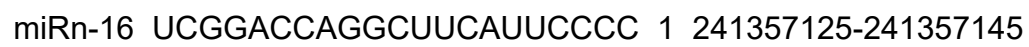

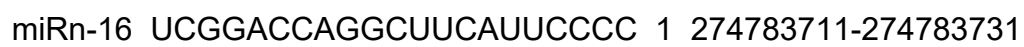

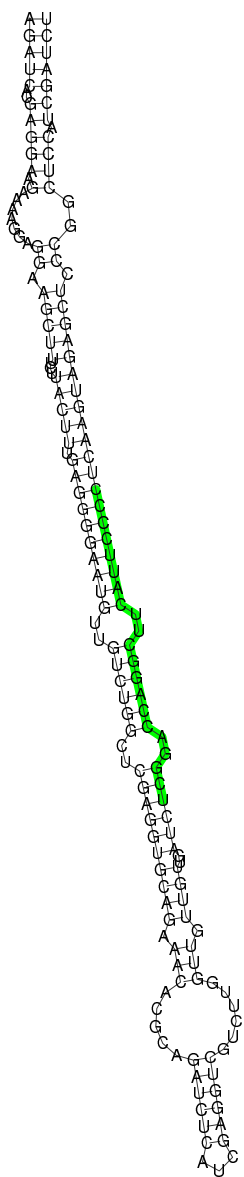

miRn-16 UCGGACCAGGCUUCAUUCCCC 4 150433956-150433976

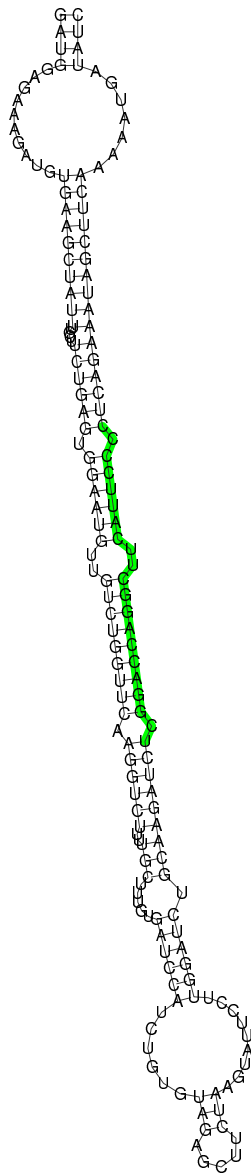

miRn-16 UCGGACCAGGCUUCAUUC 5 21954975-21954995



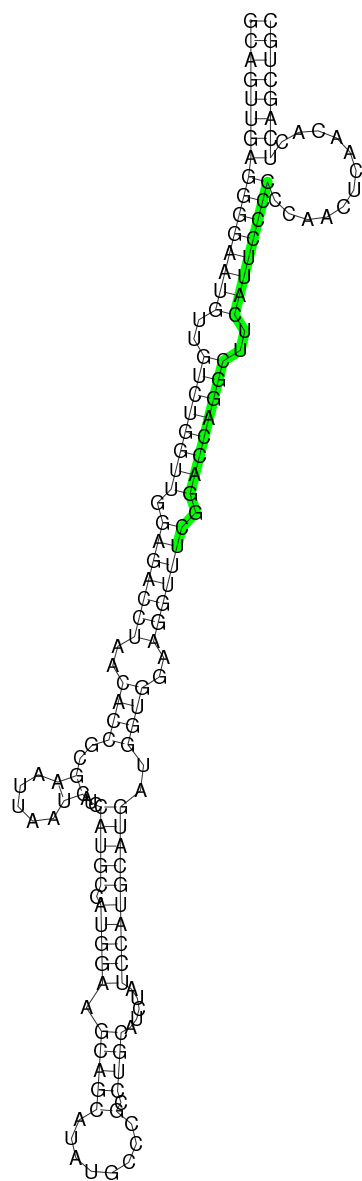

miRn-16 UCGGACCAGGCUUCAUUCCCC 1 13558900-13558920

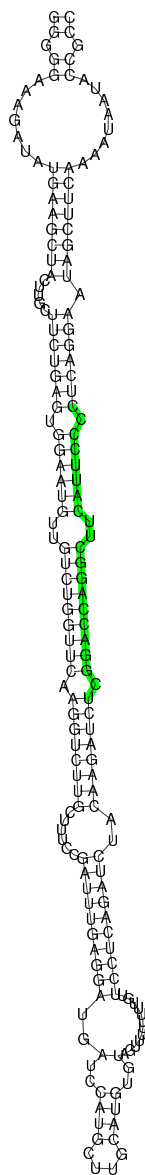

miRn-16 UCGGACCAGGCUUCAUUC CCC 1 223279185-223279205



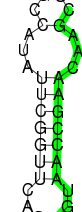

miRn-17 UCCAGACGUAACCGAACAAGC 1 58367744-58367764

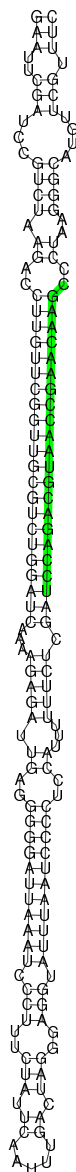

miRn-17 UCCAGACGUAACCGAACAAGC 2 103558501-103558521

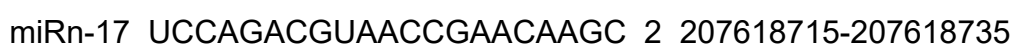

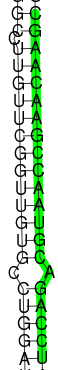

miRn-17 UCCAGACGUAACCGAACAAGC 3 212520432 212520452

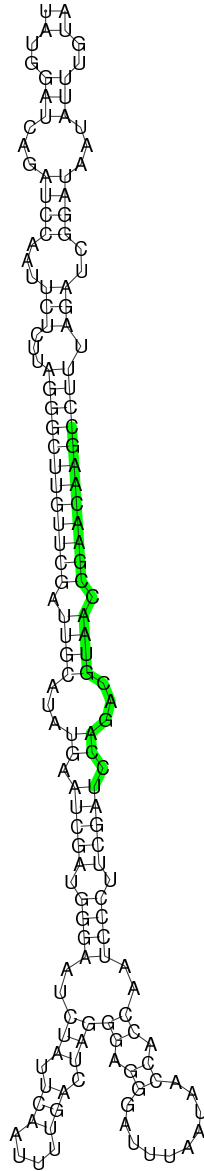

miRn-17 UCCAGACGUAACCGAACAAGC 3 45423738-45423758



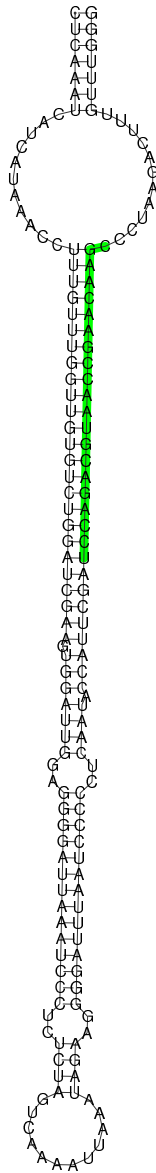

miRn-17 UCCAGACGUAACCGAACAAGC 4 236152592-236152612

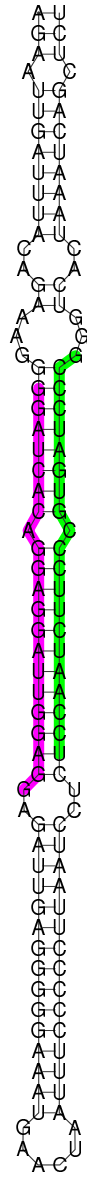

miRn-18 UCCAAUCUUCCCGUGAUCCCG 10 143953657-143953677

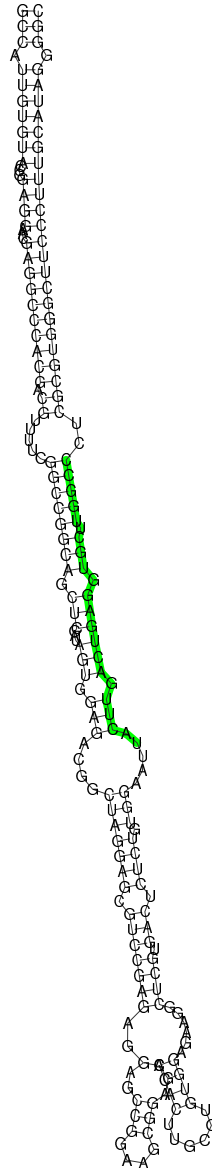

miRn-19 UACUUGACUGAGGUGCUUGGCC 1 37952896-37952917

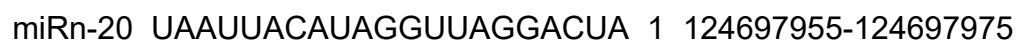

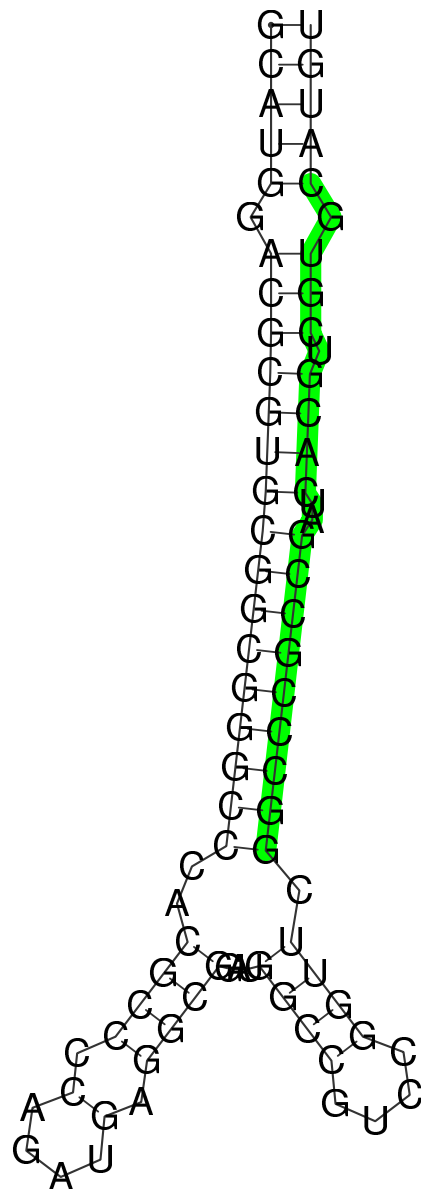

miRn-21 GGCCCGCCGAUCACGUCGUGC 5 107506390-107506410

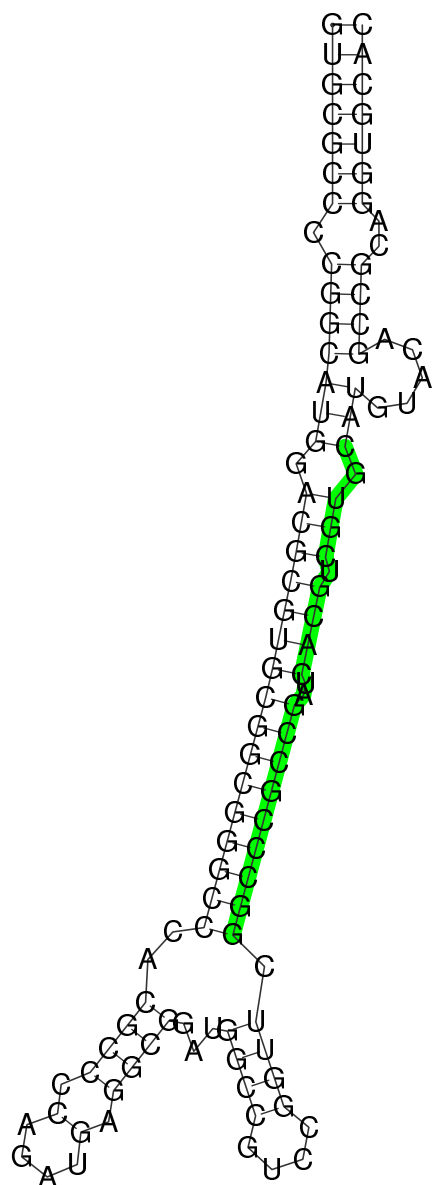

miRn-21 GGCCCGCCGAUCACGUCGUGC 7 1271358-1271378

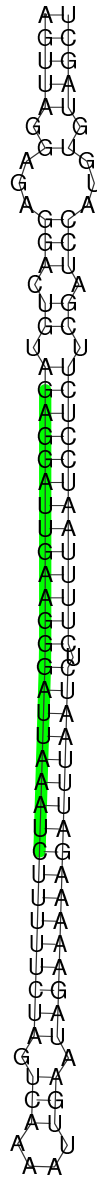

miRn-22 GAGGAUUGAAGGGAUUAAAUC 4 191157907-191157927

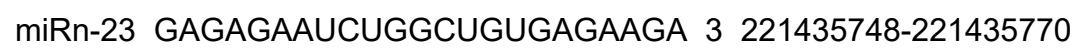



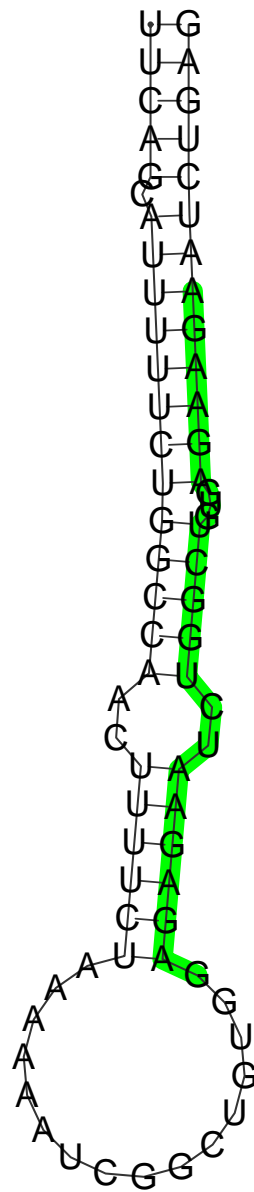

miRn-23 GAGAGAAUCUGGCUGUGAGAAGA 10 57751381-57751403

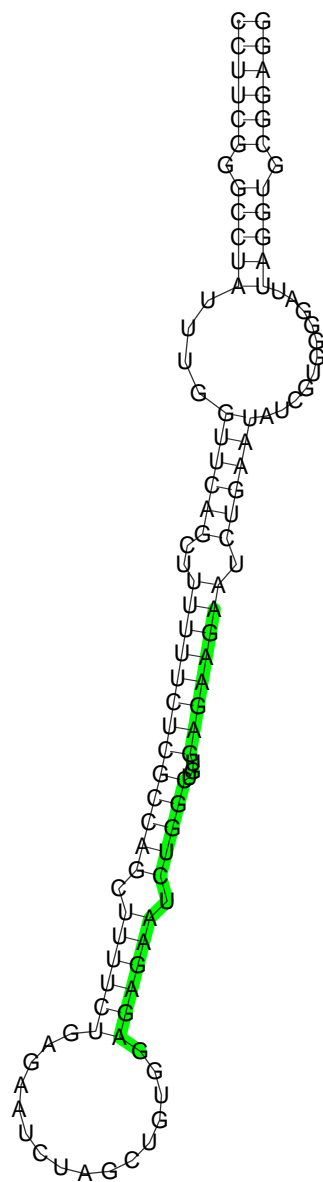

miRn-23 GAGAGAAUCUGGCUGUGAGAAGA 2 138272974-138272996

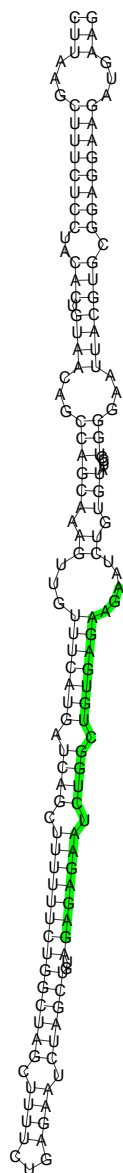

miRn-23 GAGAGAAUCUGGCUGUGAGAAGA 2 30501798-30501820

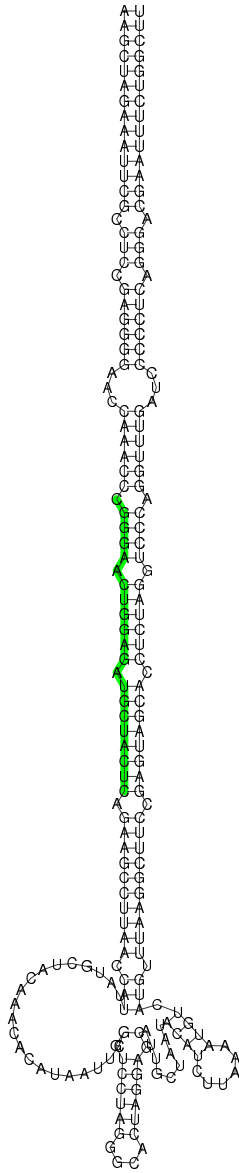

miRn-24 CGGGAACUGGAGAUGCUACUC 5 43837142-43837162

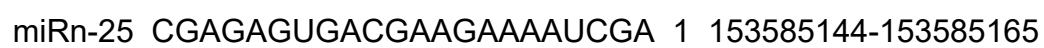

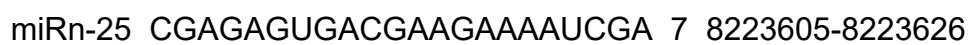

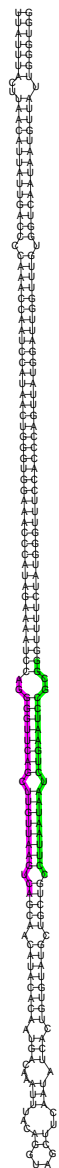

miRn-26 CCUAAUAUCUGAAUCCGCGG 3 187225200-187225221

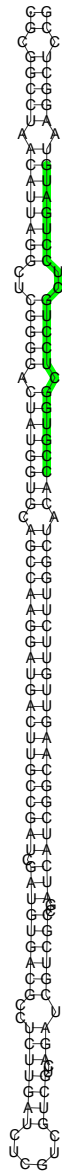

miRn-27 CCGUGGCUCCUGCUCCUGAUG 3 37610571-37610591



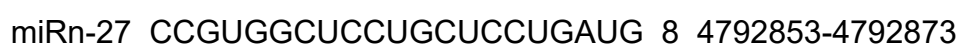

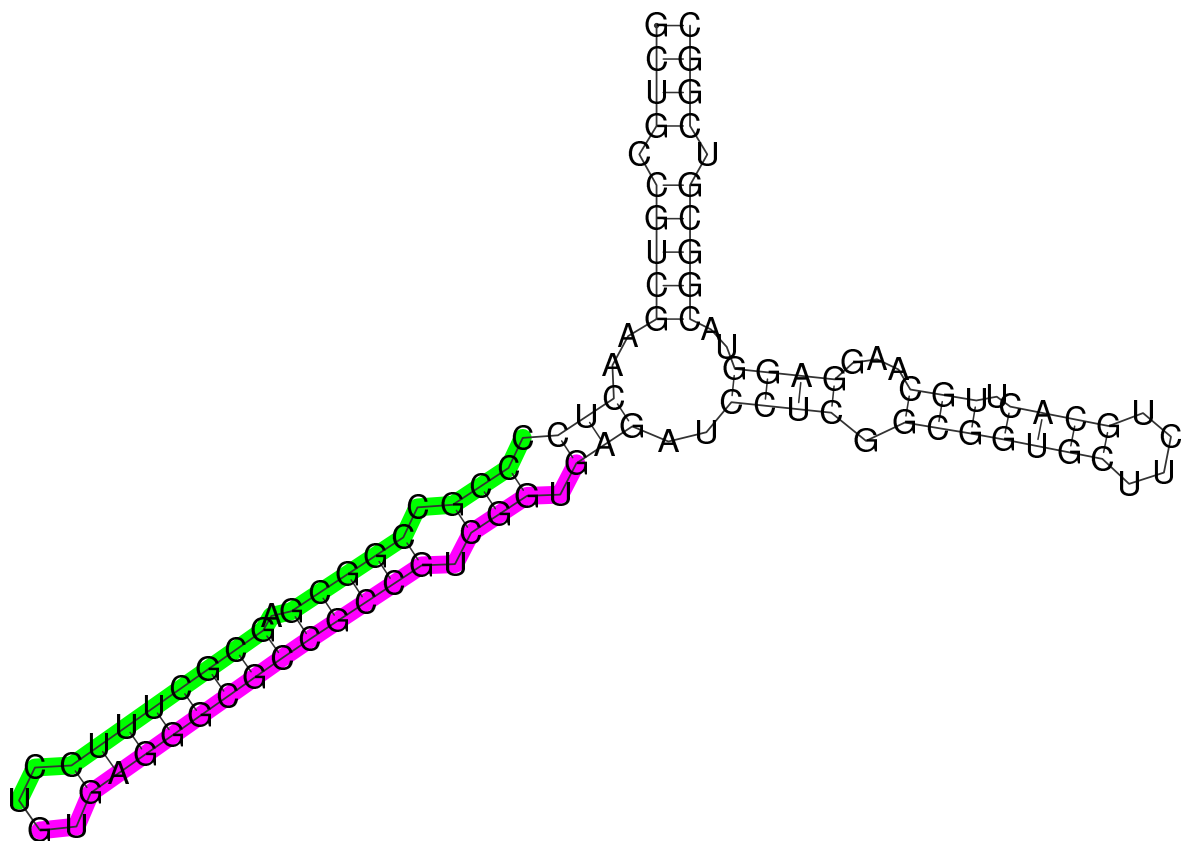

miRn-28 CCCGCCGGCGAGCGCUUCCU 1 116730726-116730746

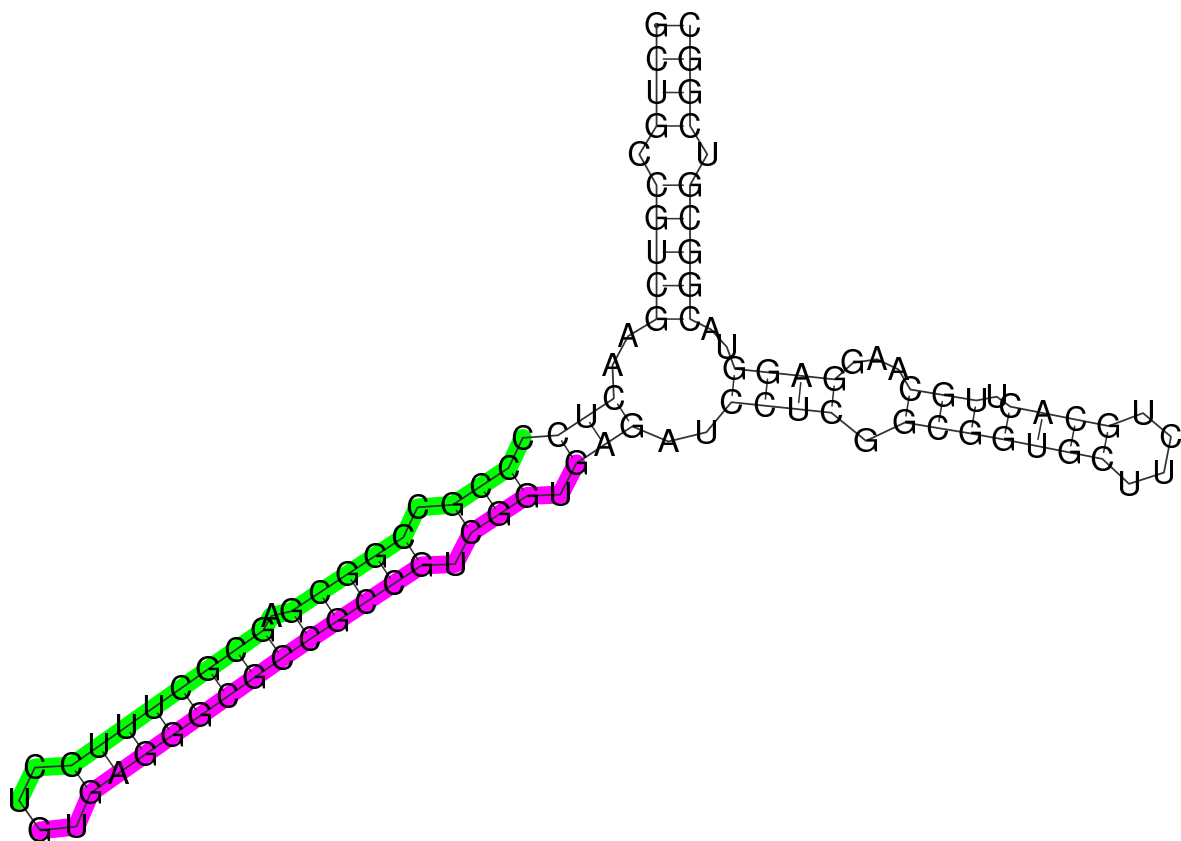

miRn-28 CCCGCCGGCGAGCGCUUCCU 1 116752622-116752642

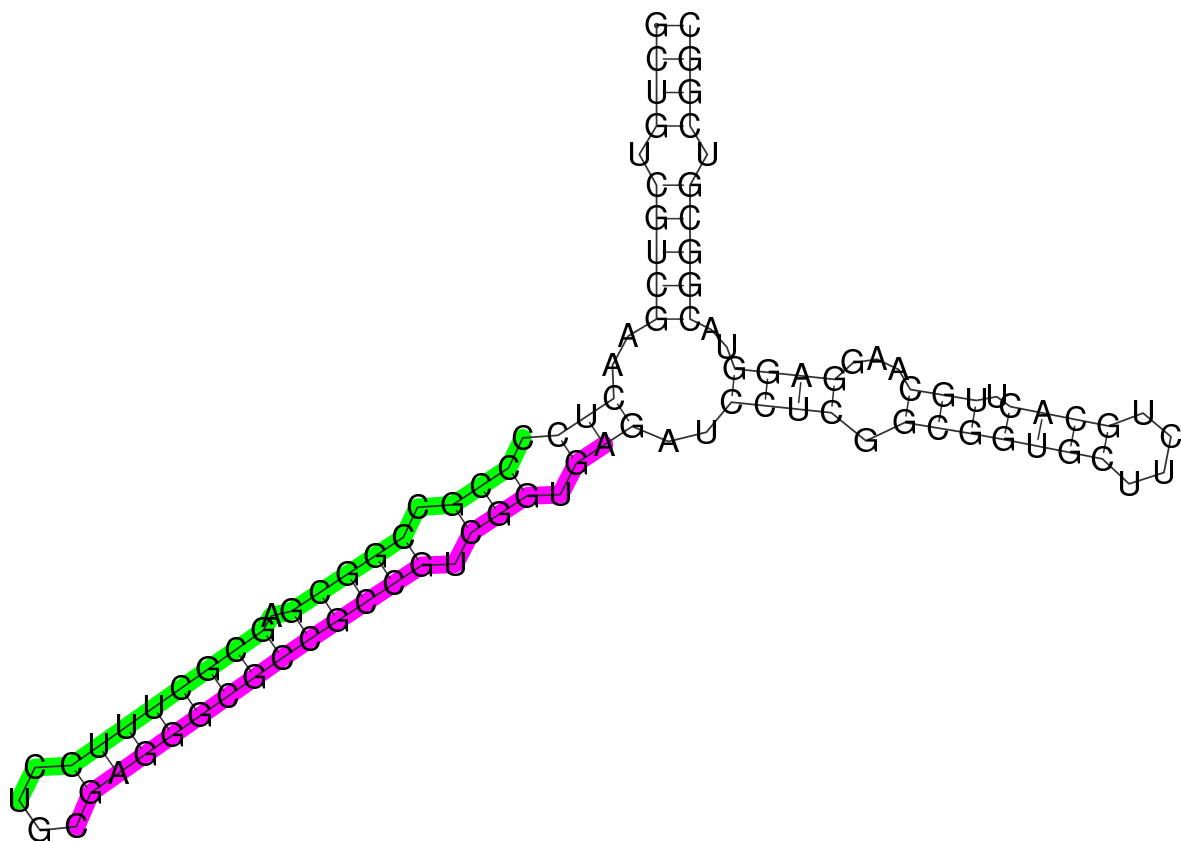

miRn-28 CCCGCCGGCGAGCGCUUCCU 6 33172057-33172077

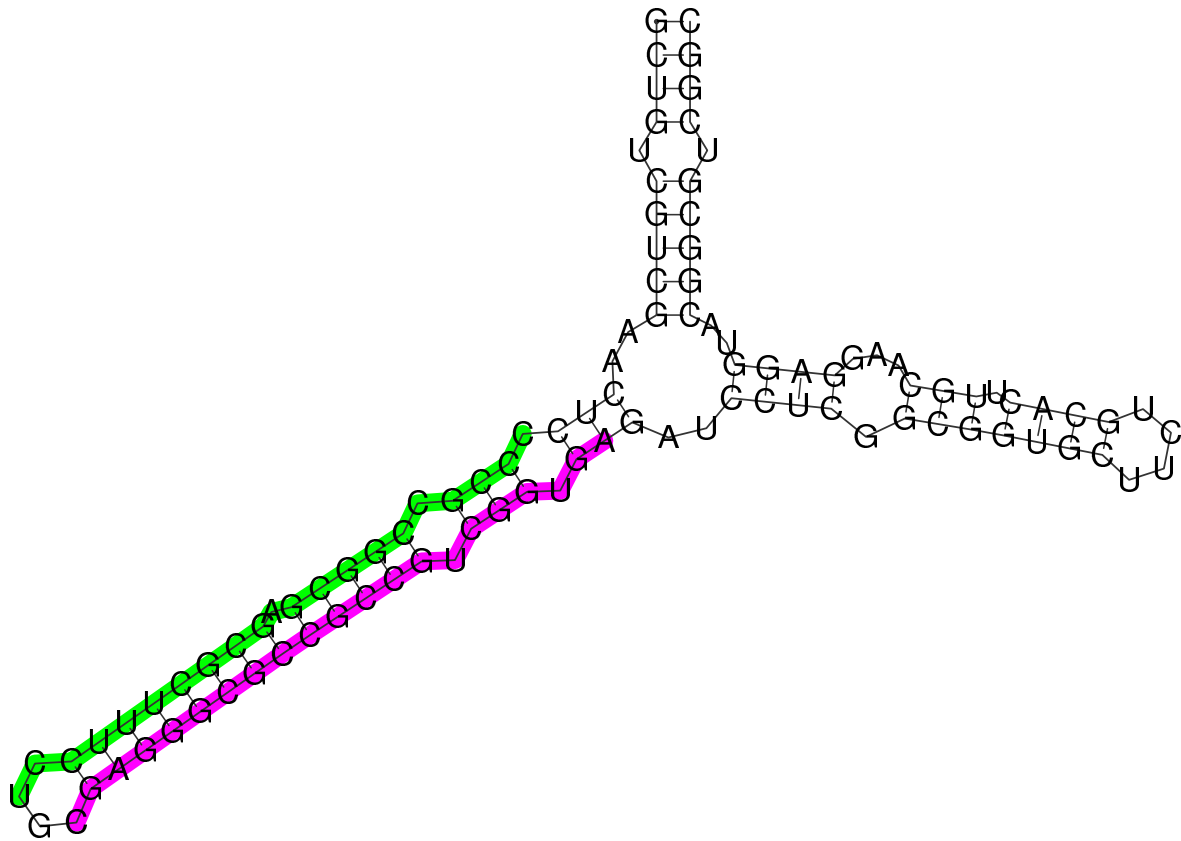

miRn-28 CCGCCGGCGAGCGCUUCCU 6 33433221-33433241

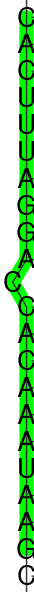

miRn-29 CACUUUAGGACCACAAUAAG 2 47194756-47194776

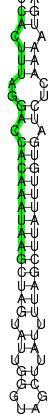

miRn-29 CACUUUAGGACCACAAUAAG 6 139139095-139139115

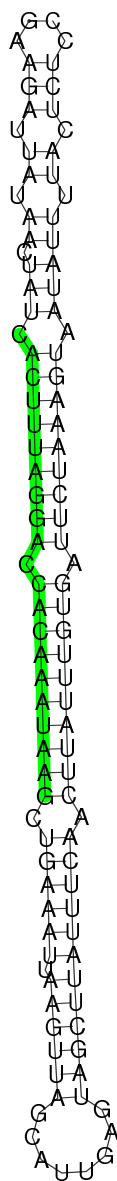

miRn-29 CACUUUAGGACCACAAUAAG 7 38554855-38554875



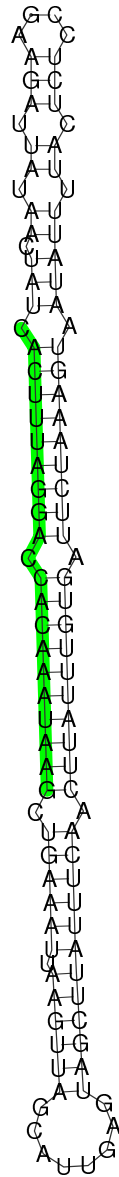

miRn-29 CACUUUAGGACCACAAUAAG 7 38566694-38566714

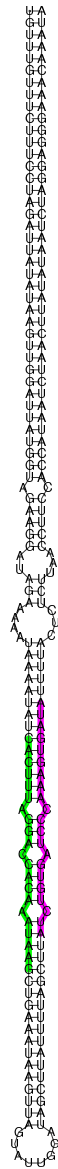

miRn-29 CACUUUAGGACCACAAUAAG 8 96988193-96988213

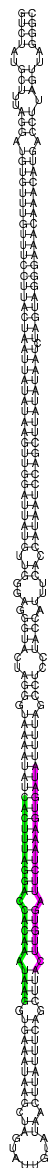

miRn-29 CACUUUAGGACCACAAUAAG 9 138750554-138750574

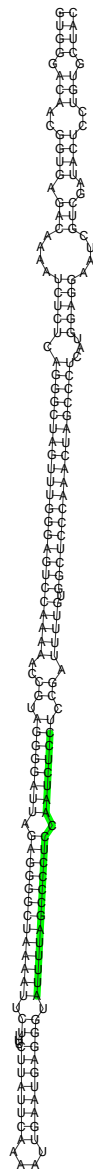

miRn-34 AUUUUAGCCCCUCCAAUCUCC 10 64849934-64849954

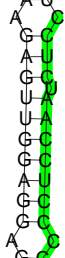

miRn-34 AUUUUAGCCCCUCCAUUCUCC 1 31812905-31812925

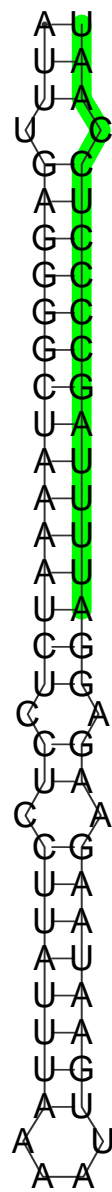

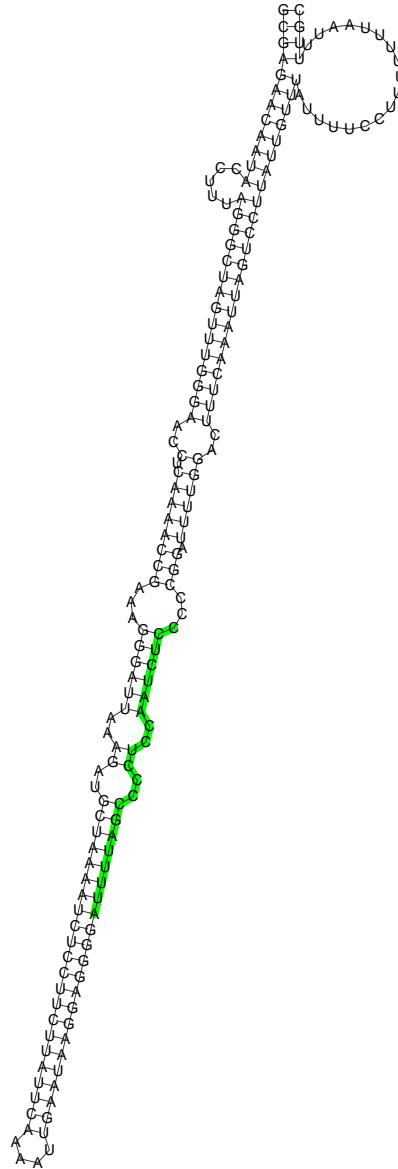

miRn-34 AUUUUAGCCCCUCCAAUCUCC 2 210616137-210616157

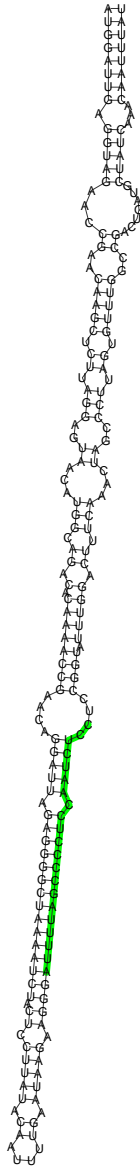

miRn-34 AUUUUAGCCCCUCCAAUCUCC 2 88590856-88590876



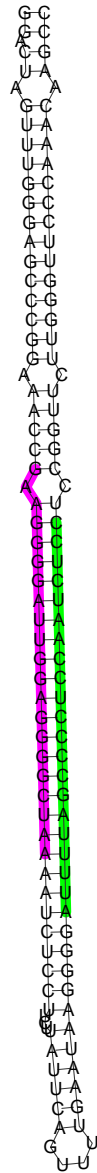

miRn-34 AUUUUAGCCCCUCCAAUCUCC 5 149512578-149512598

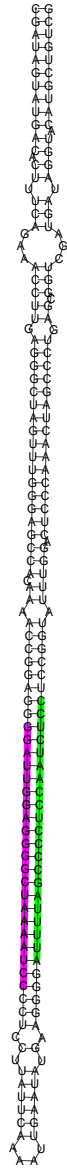

miRn-34 AUUUUAGCCCCUCCAAUCUCC 5 16452169-16452189

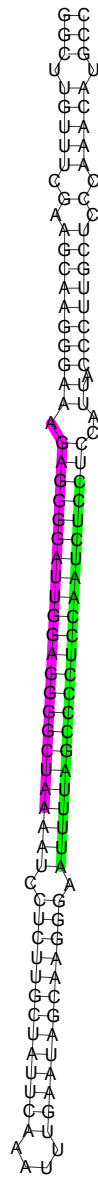

miRn-34 AUUUUAGCCCCUCCAAUCUCC 5 205836980-205837000

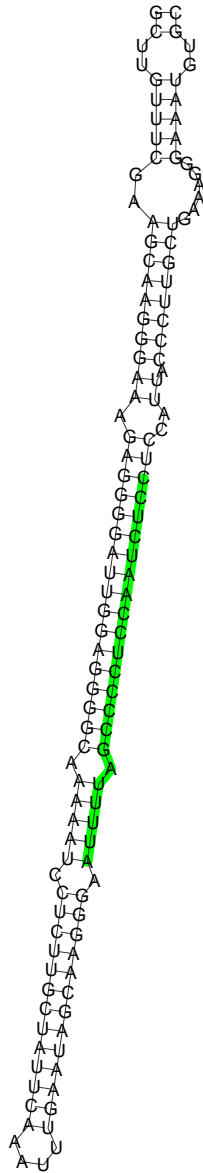

miRn-34 AUUUUAGCCCCUCCAAUCUCC 5 62942685-62942705

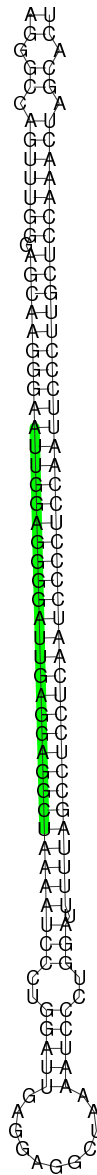

miRn-35 AUUGGAGGGGAUUGAGGAGGCU 2 78410414-78410435

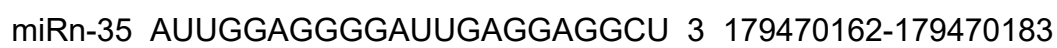

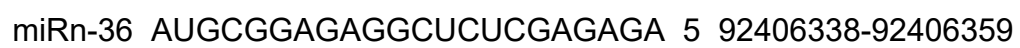

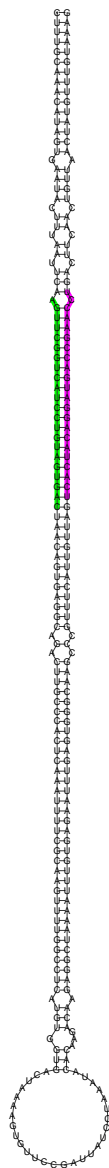

miRn-37 AGUUCGGUCAUCCUGUAGUGAC 1 192318649-192318670



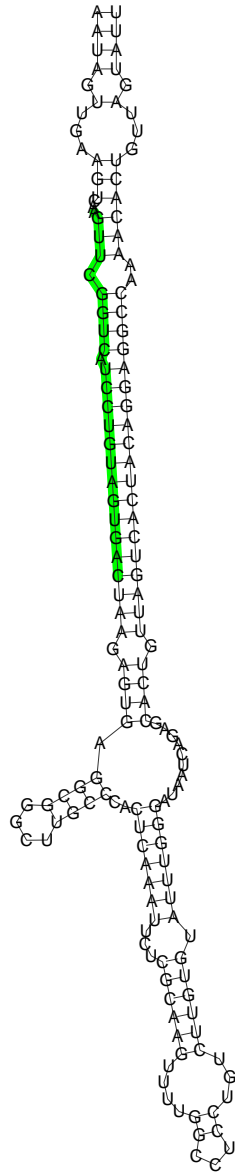

miRn-37 AGUUCGGUCAUCCUGUAGUGAC 2 219485057-219485078

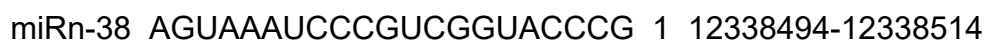

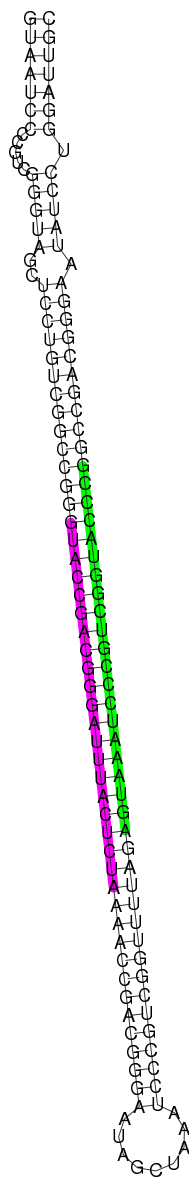

miRn-38 AGUAAAUCCCGUCGGUACCCG 2 60687852-60687872

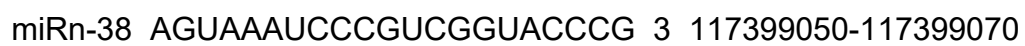

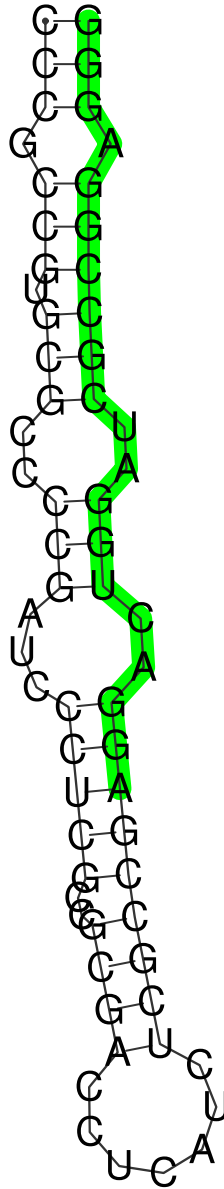

miRn-39 AGGACUGGAUCGCCGGAGGGU 10 147970442-147970462

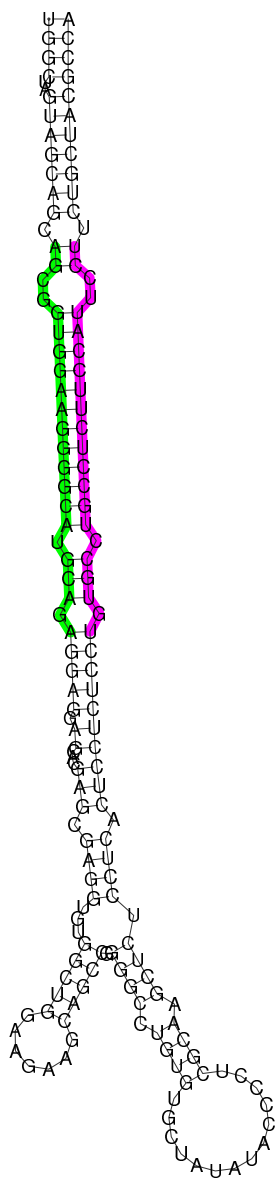

miRn-40 AGCGGUGGAAGGGGCAUGCAGA 1 6409244-6409265

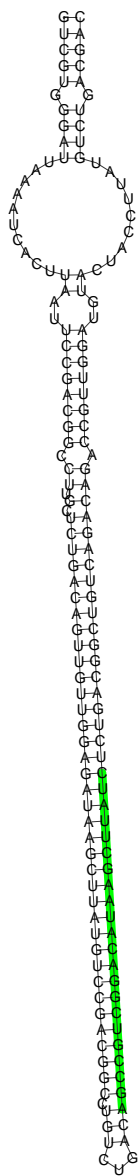

miRn-41 AGCCGUCGGACAUAAGCUUAUC 2 225192107-225192128

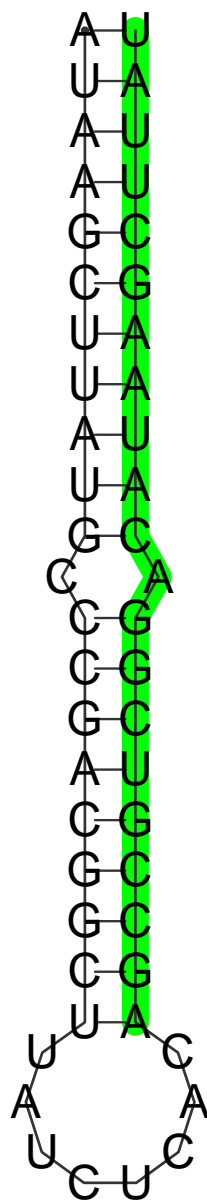

miRn-41 AGCCGUCGGACAUAAAGCUUAUC 4 10816393-10816414



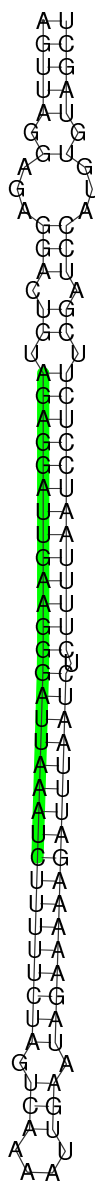

miRn-42 AGAGGAUUGAAGGGAUUAAAUC 4 191157907-191157928

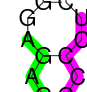

miRn-42 AGAGGAUUGAAGGGAUAAAUC 4 231272043-231272064

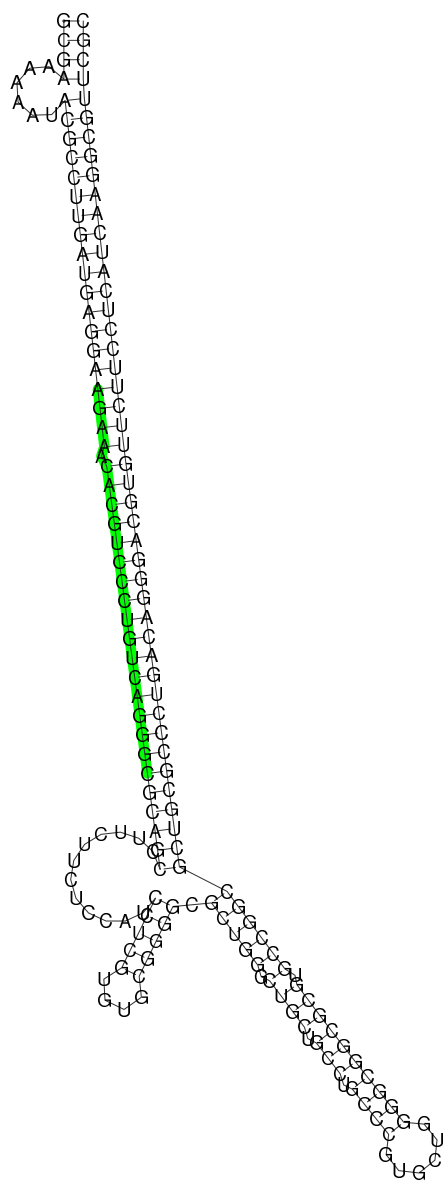

miRn-43 AGAAACACGUCCCUGUCAGGGC 7 21650640-21650661

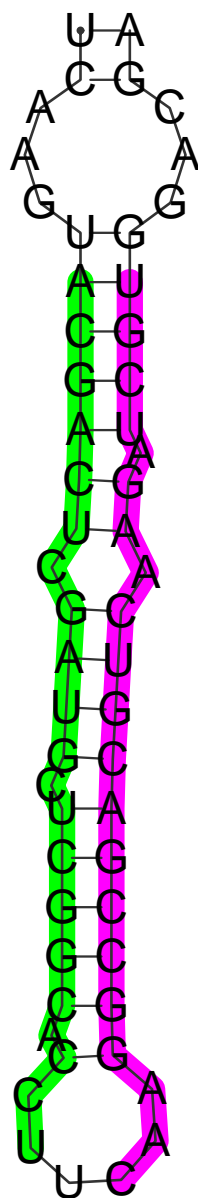

miRn-44 ACGACUCGAUGCUCGGCACCU 1 6405213-6405233

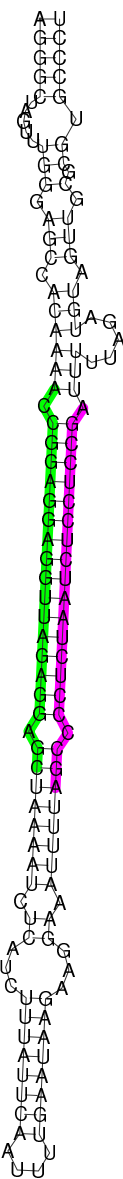

miRn-45 ACCGGAGGAGGUUAGAGGAGC 4 195967351-195967371

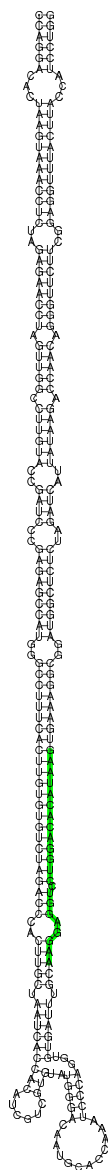

miRn-46 AAGGAGGUCCUGGACACAUAAG 7 161871296-161871317

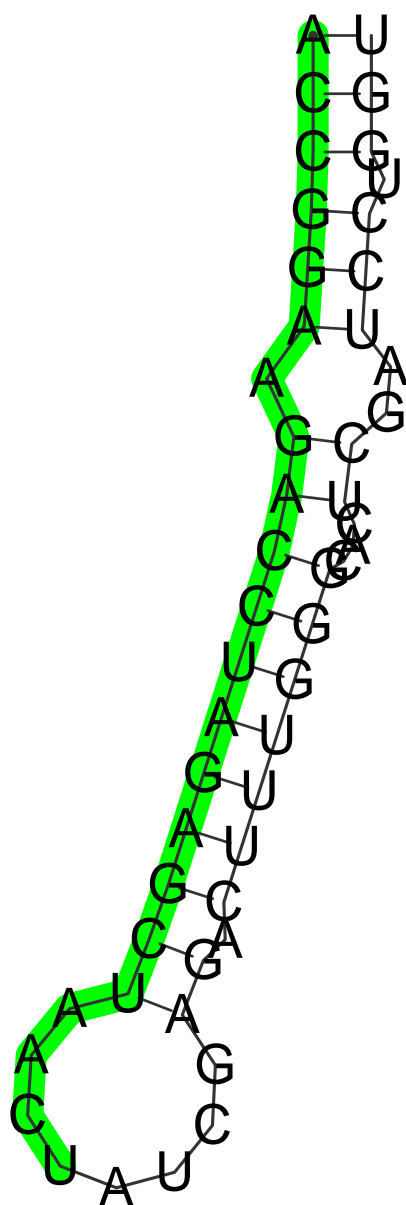

miRn-47 AACCGGAAGACCUAGAGCUAACU 7 150450558-150450580

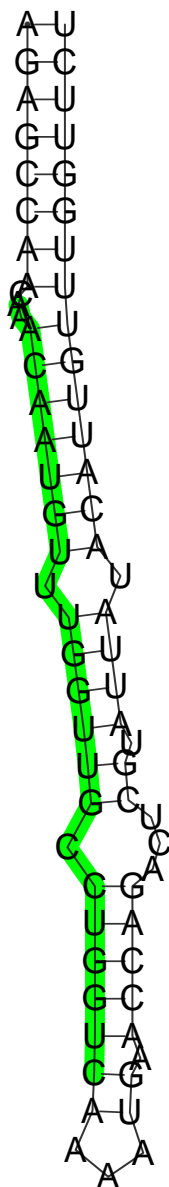



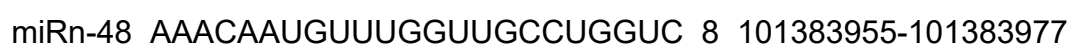

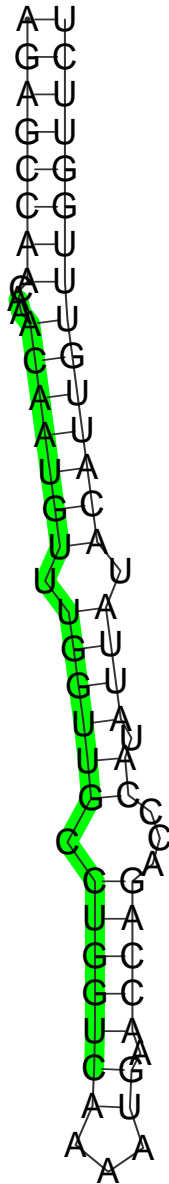

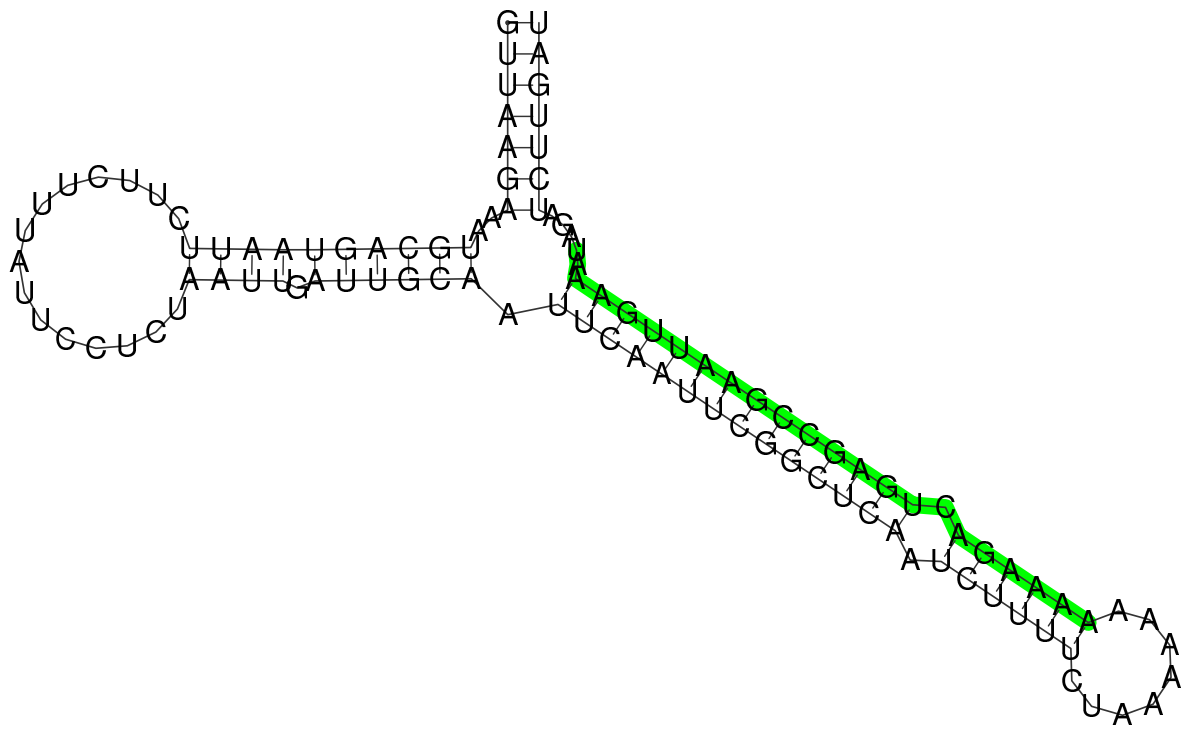

miRn-49 AAAAGACUGAGCCGAAUUGAAAU 1 203965714-203965736



miRn-49 AAAAGACUGAGCCGAAUUGAAU 1 234717275-234717297

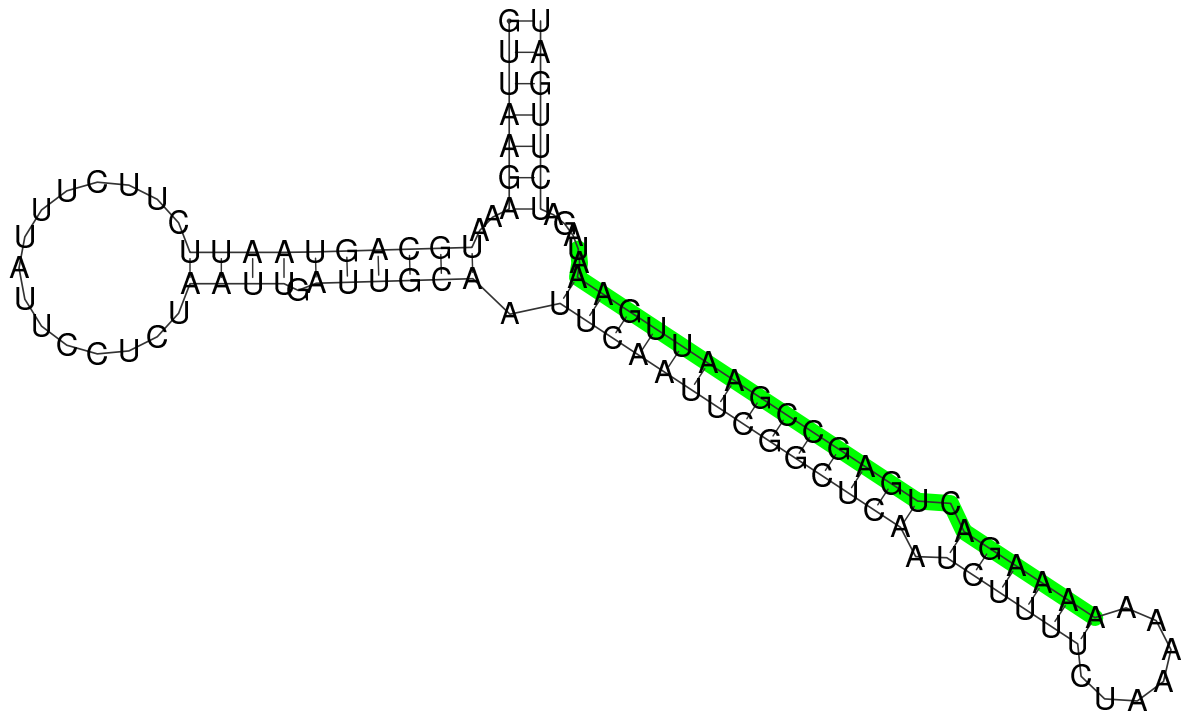

miRn-49 AAAAGACUGAGCCGAAUUGAAU 2 200754971-200754993

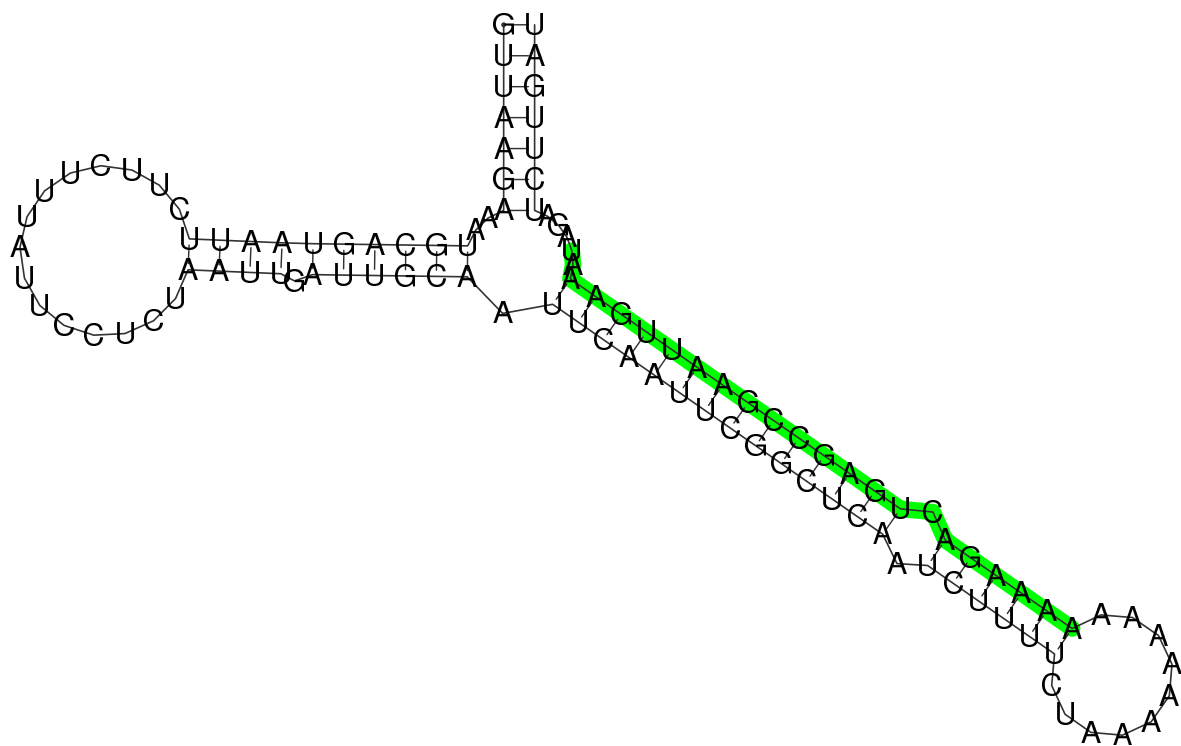

miRn-49 AAAAGACUGAGCCGAAUUGAAAU 6 160981459-160981481

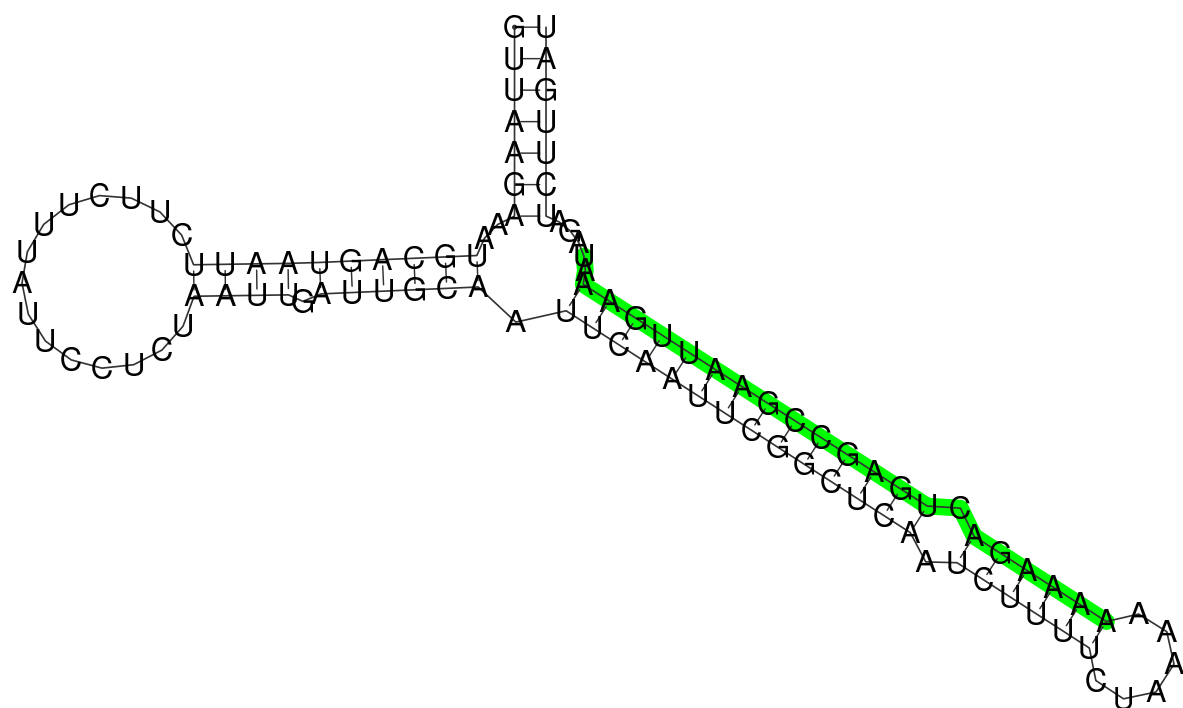

miRn-49 AAAAGACUGAGCCGAAUUGAAAU 9 33384532-33384554



miRn-49 AAAAGACUGAGCCGAAUUGAAA Mt 348891-348913



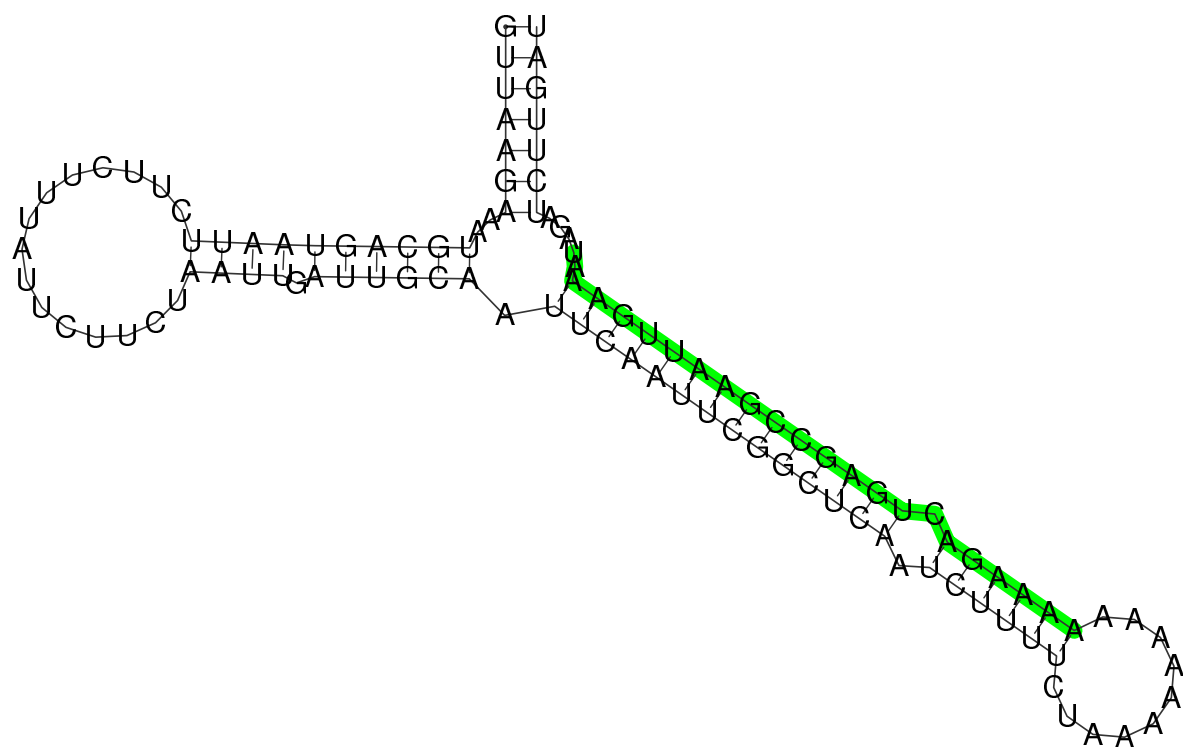

miRn-49 AAAAGACUGAGCCGAAUUGAAAU Pt 58419-58441
